# Supplementary material
Source: PubMed Central journal article supplement (PMC7323784)
Supplement: NIHMS906670-supplement-1.pdf [file NIHMS906670-supplement-1.pdf]

*Geophysical Research Letters*

Supporting Information for

**The challenge of accurately quantifying future megadrought risk in the American Southwest**

S. Coats<sup>1</sup>, J. S. Mankin<sup>2,3</sup>

<sup>1</sup>Cooperative Institute for Research in Environmental Sciences, University of Colorado, Boulder, Colorado

<sup>2</sup>Lamont-Doherty Earth Observatory of Columbia University, Palisades, New York

<sup>3</sup>NASA Goddard Institute for Space Studies, New York, New York

**Contents of this file**

Figures S1 to S3

**Introduction**

The supplementary information contains two additional figures that provided a brief validation of the CESM model.

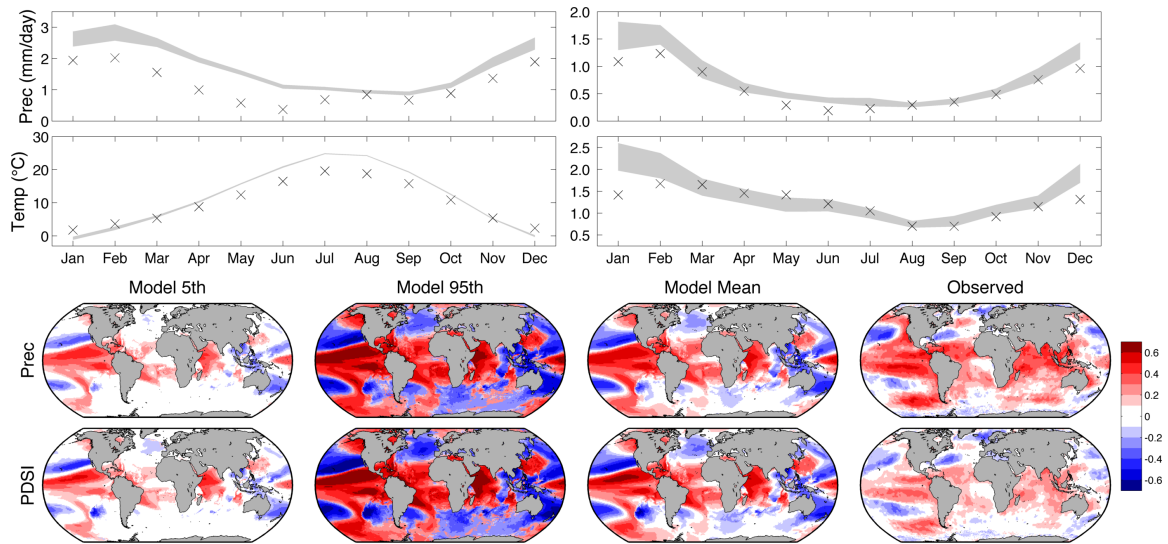

**Figure S1.** (top left panels) Precipitation climatology from the Global Precipitation Climatology Center [GPCC—*Rudolf et al., 1994*] and temperature climatology from Berkeley Earth [*Muller et al., 2013*] over the ASW as compared to the range in these climatologies across the 30 LENS ensemble members for the common period 1920-2005 C.E. (top right panels) Standard deviation of the precipitation and temperature for each month for the common period 1920-2005 C.E. (bottom panels) Correlation of annually averaged precipitation and JJA PDSI averaged over the ASW with annually averaged global sea surface temperatures (SST) between 1920-2005 C.E. For the observations we use the GPCC precipitation, NADA PDSI [*Cook et al., 2007*] and the Hadley Center Ice and Sea Surface Temperature dataset [*Rayner et al., 2003*]. For the models the correlation patterns are calculated for all 30 LENS ensemble members and 5<sup>th</sup> and 95<sup>th</sup> percentile, and mean correlation coefficient at each grid point are plotted.

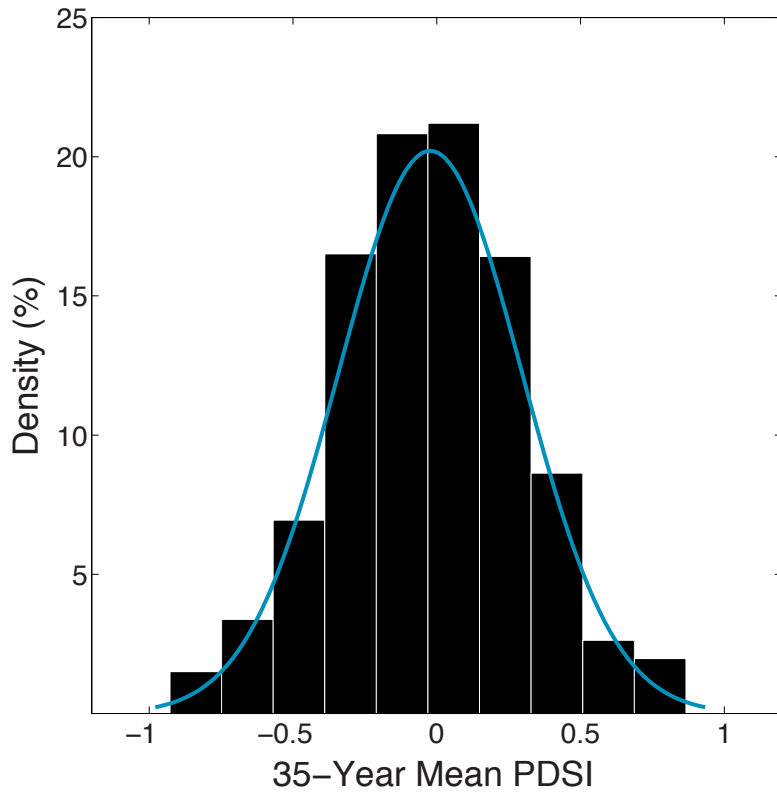

**Figure S2.** Ten-bin histogram of mean PDSI over the ASW (32°N-41°N; 125°W-105°W) for all 35-year periods from the 1100-year CESM control simulation with a normal distribution fit (blue curve).

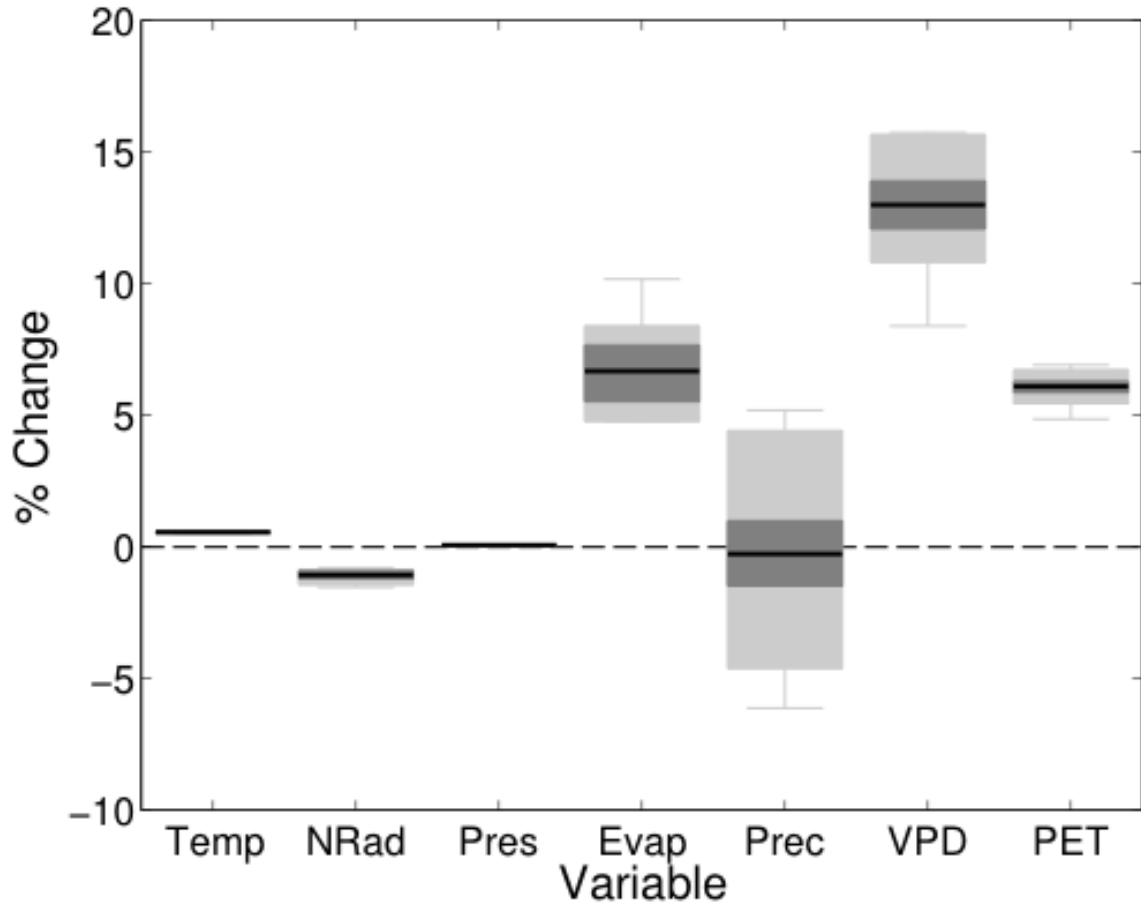

**Figure S3.** Percent change in temperature, surface net radiation, surface pressure, evaporation, precipitation, vapor pressure deficit and potential evapotranspiration between 2006-2040 C.E. relative to the mean of the pre-industrial control run. The first five variables are model outputs while the last two variables are calculated using the Penman-Monteith function [Penman, 1948; Xu and Singh, 2002]. The dark gray shaded region is the 25<sup>th</sup> to 75<sup>th</sup> percentile, the light gray shaded region is the 5<sup>th</sup> to 95<sup>th</sup> percentile, the whiskers are the full data range and the black line is the mean of the 30 LENS ensemble members.
